# Supplementary material
Source: PubMed Central journal article supplement (PMC2695051)
Supplement: 0903086106_SD1_PDF.pdf [file 0903086106_SD1_PDF.pdf]

1 TCGGTTGGGG CGACCTCGGA GCAGAACCCA **ACCTCCGAGC** **AGTACATGCT** (5F)  
51 AAGACTTCAC CAGTCAAAGC GAACTACTAT ACTCAATTGA TCCAATAACT  
101 TGACCAACGG AACAAAGTTAC **CCTAGGGATA** **ACAGCGCAAT** **CCTATTCTAG** (3F/11R)  
151 AGTCCATATC AACAAATAGGG TTTACGACCT CGATGTTGGA TCAGGACATC  
201 CCGATGGTGC AGCCGCTATT AAAGGTTTCGT TTGTTCAACG ATTAAGTCC  
251 TACGTGATCT GAGTTCAGAC CGGAGTAATC CAGGTCGGTT **TCTATCTACT** (13R)  
301 **TCAAATTCCT** *ccctgttctt ggggtgggtgt ggggtataata ctaagttgag* (4R)  
351 **atgatatcat** *ttacggggga aggcgctttg tgaagtaggc cttatcttc*  
401 *ttgtcccttc gtacaggag gaatttgaag gtagatagaa accgacctgg*  
451 *attactccgg tctgaactca gatcacgtag gactttaatc gttgaacaaa*  
501 *cgaaccttta atagcggctg caccatcggg atgtcctgat ccaacatcga*  
551 *ggtcgtaaac cctattgttg atatggactc tagaatagga ttgcgctggt*  
601 *atccctaggg taacttgttc cgttggtcaa gttattggat caattgagta*  
651 *tagtagttcg ctttgactgg tgaagtctta gcatgtactg ctcggaggtt*  
701 *gggttctgct ccgaggtcgc cccaaccgaa atttttaatg caggtttggg*  
751 *agtttaggac ctgtggggtt gttaggtact gtttgcatta ataaattaa*  
801 *gctccatagg gtcttctcgt cttgctgtgt tatgccgcc tcttcacggg*  
851 *caggtcaatt tcaactggta aaagtaagag acagctgaac cctcgtggag*  
901 *ccattcatac aggtccctat ttaaggaaca agtgattatg ctacctttgc*  
951 *acggttaggg taccgcgcc gtaaacatg tgtcactggg caggcgggtc*  
1001 *ctctaatact ggtgatgcta gaggtgatgt ttttggtaaa caggcggggt*  
1051 *aagatttgcc gagttccttt tacttttttt aacctttcct tatgagcatg*  
1101 *cctgtgttg gttgacagtg agggtaataa tgacttggtg gttgattgta*  
1151 *gatattgggc tgttaattgt cagttcagtg ttttaatctg acgcaggctt*  
1201 *atgcggagga gaatgttttc atgttactta tactaacatt agttcttcta*  
1251 *tagggtgata gattgggtcca attgggtgtg aggagttcag ttatatgttt*  
1301 *gggatttttt aggtagtggg tgttgagctt gaacgctttc ttaattgggtg*  
1351 *gctgctttta ggcctactat ggggtgtaaa ttttttactc tctctacaag*  
1401 *gttttttctt agtgtccaaa gagctgttcc tctttggact aacagttaaa*  
1451 *tttacaaggg gatttagagg gttctgtggg caaatttaaa gttgaactaa*  
1501 *gattctatct tggacaacca gctatcacca ggctcggtag gtttgtcgcc*  
1551 *tctacctata aatcttcca ctattttgct acatagacgg gtgtgctctt*  
1601 *ttagctgttc ttaggtagct cgtctgggtt cgggggtctt agctttggct*  
1651 *ctccttgcaa agttatttct agttaattca ttatgcagaa ggtatagggg*  
1701 *ttagtccttg ctatattatg cttgggtata atttttcatc tttcccttgc*  
1751 *ggtactatat ctattgcgcc aggtttcaat ttctatcgcc tatactttat*  
1801 *ttgggtaaat ggtttggcta aggttgtctg gtagtaaggt ggagtgggtt* (10R)  
1851 **tggggctagg** **tttagc**

**Dataset S1.** Sequence of the ASncmtRNA-1. The sequence of the human ASncmtRNA-1 revealed an IR of 310 nt (uppercase) linked to the 5' region of the antisense 16S mitochondrial RNA (lowercase). The 29 nt sequence at the 5' end (          ) was determined by 5' RACE (see text). The sequences in bold correspond to the different primers utilized as shown in Fig. 2A. They are indicated at the right of the sequence. The sequence from position 317 to 412 () corresponds to the 96 nt loop (GenBank Access No EU863789).
